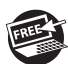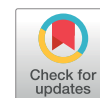

## Issues and Events

### 79th SCIENTIFIC SESSIONS WEBCASTS

Webcasts from the 79th annual American Diabetes Association Scientific Sessions are available. Held in June 2019, this meeting brought together scientists and health care professionals to discuss issues pertaining to diabetes research, care, and education. To access the webcasts, please visit [professional.diabetes.org/webcasts-ss2019](https://professional.diabetes.org/webcasts-ss2019).

### ADVANCED POSTGRADUATE COURSE

The 67th annual American Diabetes Association Advanced Postgraduate Course will be held in San Francisco, CA, from 31 January to 2 February 2020. Join your colleagues and diabetes experts for presentations and discussions on cutting-edge clinical research in diabetes. The course will cover the latest clinical research translated into evidence-based treatment strategies to improve outcomes in your patients with diabetes. Discuss clinical cases with world-renowned faculty, and take home practical patient management tools that you can use immediately in your practice. For more information, please visit [professional.diabetes.org/ce](https://professional.diabetes.org/ce).

### DIABETES IS PRIMARY

Diabetes Is Primary will be held in Los Angeles, CA, on 18 October 2019; in Tampa, FL, on 23 October 2019; in Chicago, IL, on 14 November 2019; in Baltimore, MD, on 21 November 2019; and in Phoenix, AZ, on 25 February 2020. The American Diabetes Association will bring together health care professionals interested in the clinical management of diabetes and its complications for an innovative educational initiative developed specifically for the primary care community. This initiative will offer information and tools needed to improve patient outcomes through patient engagement. For more information, please visit [professional.diabetes.org/diabetes-primary](https://professional.diabetes.org/diabetes-primary).

### IDF CONGRESS 2019

The International Diabetes Federation (IDF) Congress will be held in Busan, Korea, 2–6 December 2019. The IDF

Congress explores new areas in diabetes research, education, and public health. Key objectives include promoting better understanding of the global diabetes pandemic and influencing the implementation of health care initiatives to improve the lives of the millions of people living with diabetes and the many more at risk. Please visit <https://idf.org> for further information.

### DIABETES STANDARDS OF CARE 2019 WEBCAST

Presented by William T. Cefalu, MD, Chief Scientific, Medical & Mission Officer of the American Diabetes Association, this webcast presents the key updates and highlights from the *Standards of Medical Care in Diabetes—2019*. To access the webcast, please visit [professional.diabetes.org/SOC](https://professional.diabetes.org/SOC).

### STANDARDS OF MEDICAL CARE IN DIABETES—2019

American Diabetes Association “Standards of Medical Care in Diabetes” is based on a complete review of the relevant literature by a diverse group of highly trained clinicians and researchers. After weighing the quality of evidence, from rigorous double-blind clinical trials to expert opinion, recommendations are drafted, reviewed, and submitted for approval to the American Diabetes Association Executive Committee. To see the 2019 Standards, please visit [professional.diabetes.org/SOC](https://professional.diabetes.org/SOC).

### DIABETES CORE UPDATE PODCASTS

*Diabetes Core Update* is a monthly audio podcast devoted to presenting and discussing the latest clinically relevant articles from the American Diabetes Association’s scholarly journals. *Diabetes Core Update* audio podcasts are free and can be accessed through iTunes or RSS feed. For more information, please visit [diabetesjournals.org/content/diabetes-core-update-podcasts](https://diabetesjournals.org/content/diabetes-core-update-podcasts).

**Diabetes Care** (print ISSN 0149-5992, online ISSN 1935-5548) is owned, controlled, and published monthly by the American Diabetes Association, Inc., 2451 Crystal Drive, Suite 900, Arlington, VA 22202. *Diabetes Care* is a registered trademark of the American Diabetes Association. **Periodicals postage** paid at Arlington, VA, and additional mailing offices. **POSTMASTER:** Send address changes to *Diabetes Care*, American Diabetes Association, Inc., Journal Subscriptions, 2451 Crystal Drive, Suite 900, Arlington, VA 22202. Claims for missing issues should be made within 6 months of publication. The publisher expects to supply missing issues free of charge only when losses have been sustained in transit and when the reserve stock permits.
